# Supplementary material for: Unique distribution of ellagitannins in ripe strawberry fruit revealed by mass spectrometry imaging
Source: PubMed Central journal article supplement — Curr Res Food Sci. 2021 Nov 17;4:821–8. doi: 10.1016/j.crfs.2021.11.006 (PMC8606305; doi:10.1016/j.crfs.2021.11.006), 2021-11-17
Supplement: mmc1.pdf [file mmc1.pdf]

## **SUPPLEMENTARY MATERIAL**

### **Unique distribution of ellagitannins in ripe strawberry fruit revealed by mass spectrometry imaging**

**Hirofumi Enomoto**<sup>a, b, c, \*</sup>

<sup>a</sup> Department of Biosciences, Faculty of Science and Engineering, Teikyo University,  
Utsunomiya 320-8551, Japan

<sup>b</sup> Division of Integrated Science and Engineering, Graduate School of Science and Engineering,  
Teikyo University, Utsunomiya 320-8551, Japan

<sup>c</sup> Advanced Instrumental Analysis Center, Teikyo University, Utsunomiya 320-8551, Japan

\* Corresponding author: Hirofumi Enomoto

*Address:* Department of Biosciences, Faculty of Science and Engineering, Teikyo University,  
Utsunomiya, 320-8551, Japan.

*E-mail:* enomoto@nasu.bio.teikyo-u.ac.jp

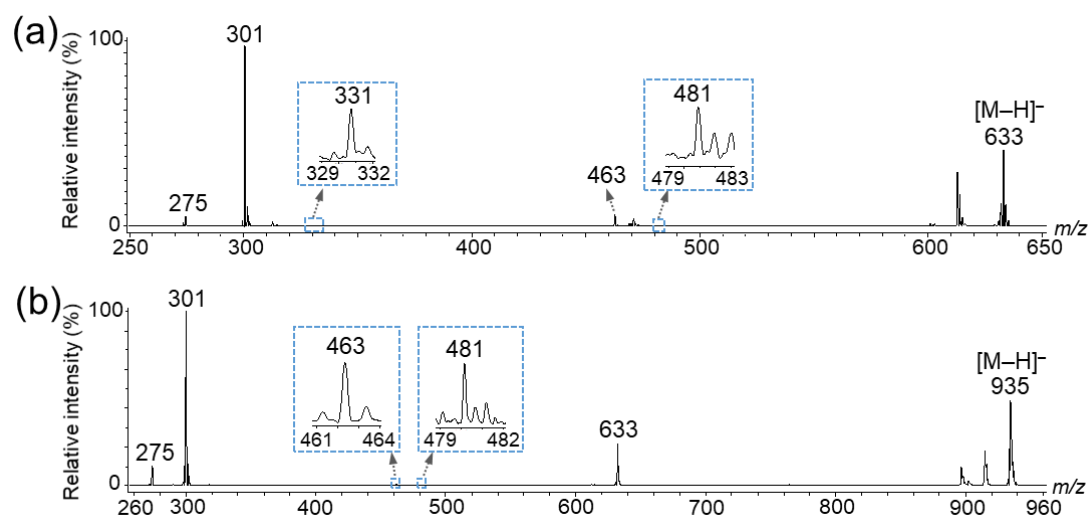

**Supplementary Fig. S1.** Matrix-assisted laser desorption/ionization-tandem mass spectrometry (MALDI-MS/MS) analysis of ellagitannin standards. MS/MS spectra of (a) strictinin and (b) casuarictin.

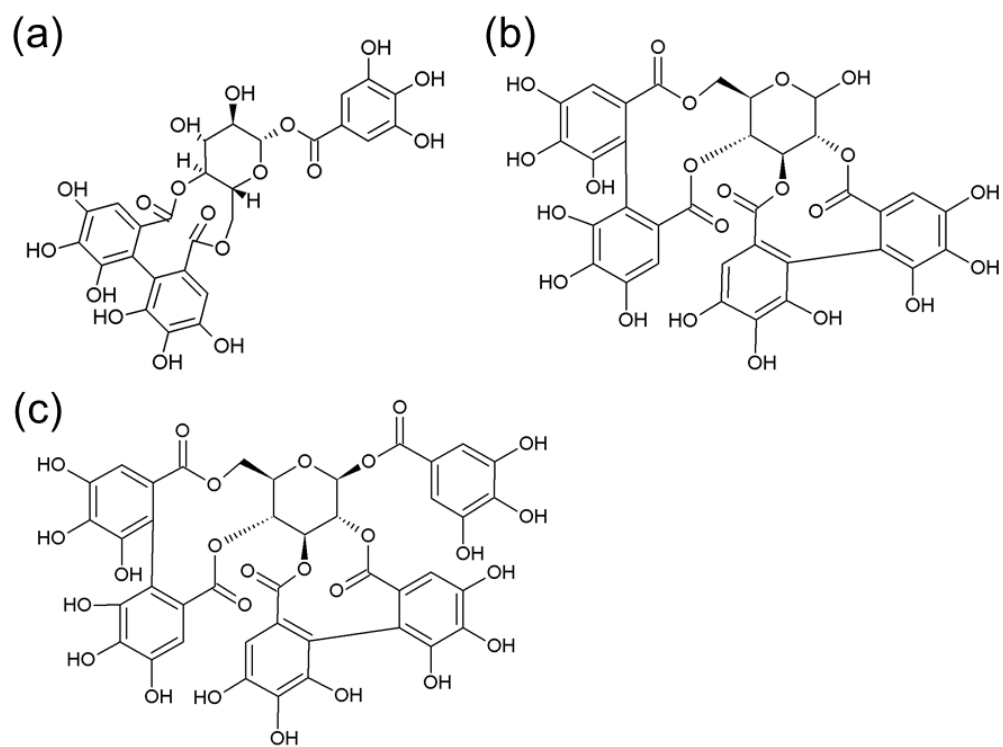

**Supplementary Fig. S2.** Structures of (a) strictinin, (b) pedunculagin, and (b) casuarictin.

Source: ChemSpider (<http://www.chemspider.com/>).

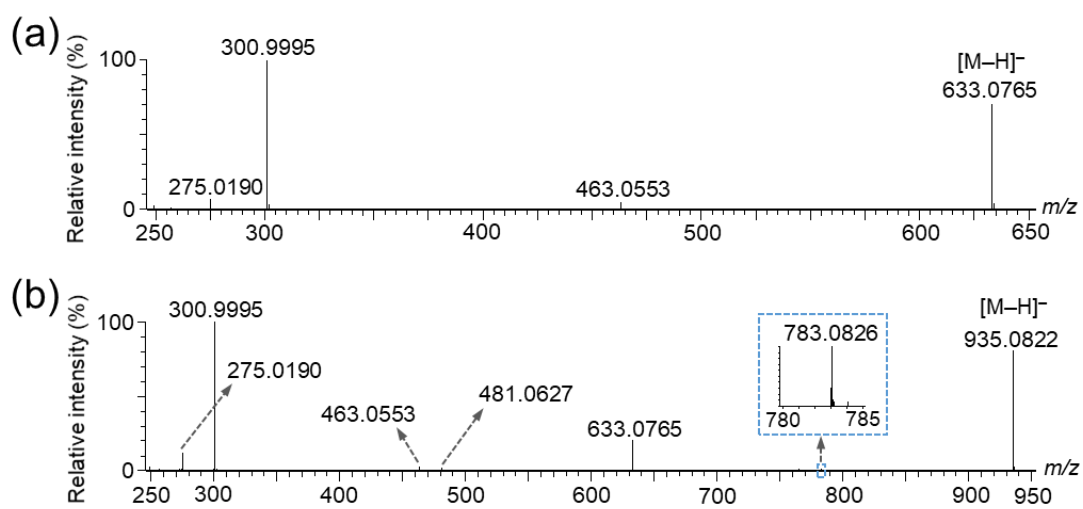

**Supplementary Fig. S3.** Liquid chromatography-electrospray ionization-tandem mass spectrometry (LC-ESI-MS/MS) analysis of ellagitannin standards. MS/MS spectra of (a) strictinin and (b) casuarictin.

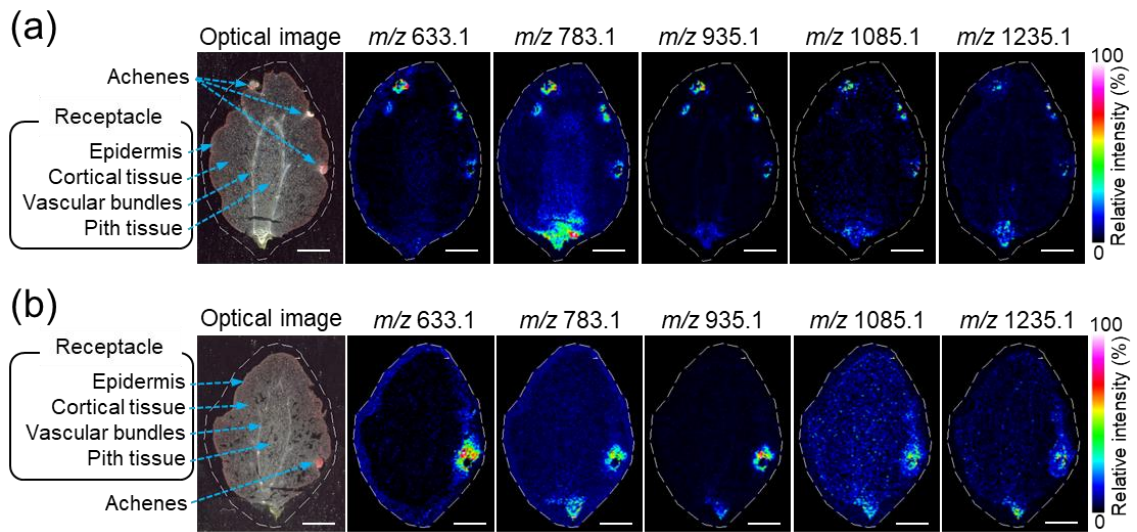

**Supplementary Fig. S4.** Representative ion images of identified ellagitannins in strawberry fruit using matrix-assisted laser desorption/ionization-mass spectrometry imaging. The images shown in (a) and (b) were obtained from two different strawberry fruits different from the one shown in Figure 3. The dotted white line shows the analyzed region. Scale bar = 5 mm.
